# Supplementary material
Source: publisher figshare collection journal article supplement (https://gsajournals.figshare.com/ndownloader/files/13529360)
Supplement: Supplementary file 1 [file 13529360]

Line	y
Arsenio_002	22
Arsenio_005	2
Arsenio_007	5
Arsenio_010	0
Arsenio_011	12
Arsenio_012	14
Arsenio_016	43
Arsenio_017	11
Arsenio_020	25
Arsenio_021	3
Arsenio_025	0
Arsenio_026	26
Arsenio_027	NA
Arsenio_029	9
Arsenio_030	21
Arsenio_031	28
Arsenio_032	4
Arsenio_033	27
Arsenio_035	10
Arsenio_036	21
Arsenio_039	11
Arsenio_040	NA
Arsenio_041	16
Arsenio_042	0
Arsenio_044	16
Arsenio_045	0
Arsenio_046	35
Arsenio_047	5
Arsenio_049	8
Arsenio_050	13
Arsenio_051	8
Arsenio_052	0
Arsenio_053	NA
Arsenio_054	0
Arsenio_055	9
Arsenio_057	5
Arsenio_058	0
Arsenio_059	NA
Arsenio_060	13
Arsenio_061	17
Arsenio_062	6
Arsenio_063	NA
Arsenio_064	NA
Arsenio_065	0
Arsenio_066	22
Arsenio_067	1
Arsenio_068	9
Arsenio_069	5
Arsenio_070	6
Arsenio_071	123
Arsenio_072	2
Arsenio_073	55
Arsenio_074	NA
Arsenio_075	NA
Arsenio_076	24
Arsenio_078	32
Arsenio_079	31
Arsenio_080	0
Arsenio_082	15
Arsenio_083	NA
Arsenio_084	6
Arsenio_085	1
Arsenio_087	0
Arsenio_088	106
Arsenio_089	96
Arsenio_090	28
Arsenio_091	31
Arsenio_092	2
Arsenio_093	22
Arsenio_094	74
Arsenio_095	1
Arsenio_096	4
Arsenio_097	12
Arsenio_098	NA
Arsenio_099	50
Arsenio_101	31
Arsenio_102	15
Arsenio_104	0
Arsenio_106	35
Arsenio_107	0
Arsenio_108	NA
Arsenio_109	2
Arsenio_110	10
Arsenio_111	NA
Arsenio_112	28
Arsenio_113	31
Arsenio_114	NA
Arsenio_116	4
Arsenio_117	NA
Arsenio_119	13
Arsenio_120	51
Arsenio_121	6
Arsenio_122	3
Arsenio_124	18
Arsenio_125	8
Arsenio_126	11
Arsenio_127	0
Arsenio_128	NA
Arsenio_129	2
Arsenio_130	0
Arsenio_131	NA
Arsenio_132	58
Arsenio_133	11
Arsenio_134	0
Arsenio_135	80
Arsenio_136	14
Arsenio_137	NA
Arsenio_138	2
Arsenio_139	1
Arsenio_140	7
Arsenio_142	2
Arsenio_143	2
Arsenio_145	21
Arsenio_146	1
Arsenio_147	5
Arsenio_149	51
Arsenio_150	7
Arsenio_151	2
Arsenio_153	NA
